# Supplementary material
Source: PubMed Central journal article supplement (PMC5630191)
Supplement: mmc1.pdf [file mmc1.pdf]

**Supplemental Data**

**Nested Inversion Polymorphisms Predispose**

**Chromosome 22q11.2 to Meiotic Rearrangements**

**Wolfram Demaerel, Matthew S. Hestand, Elfi Vergaelen, Ann Swillen, Marcos López-Sánchez, Luis A. Pérez-Jurado, Donna M. McDonald-McGinn, Elaine Zackai, Beverly S. Emanuel, Bernice E. Morrow, Jeroen Breckpot, Koenraad Devriendt, Joris R. Vermeesch, and International 22q11.2 Brain and Behavior Consortium**

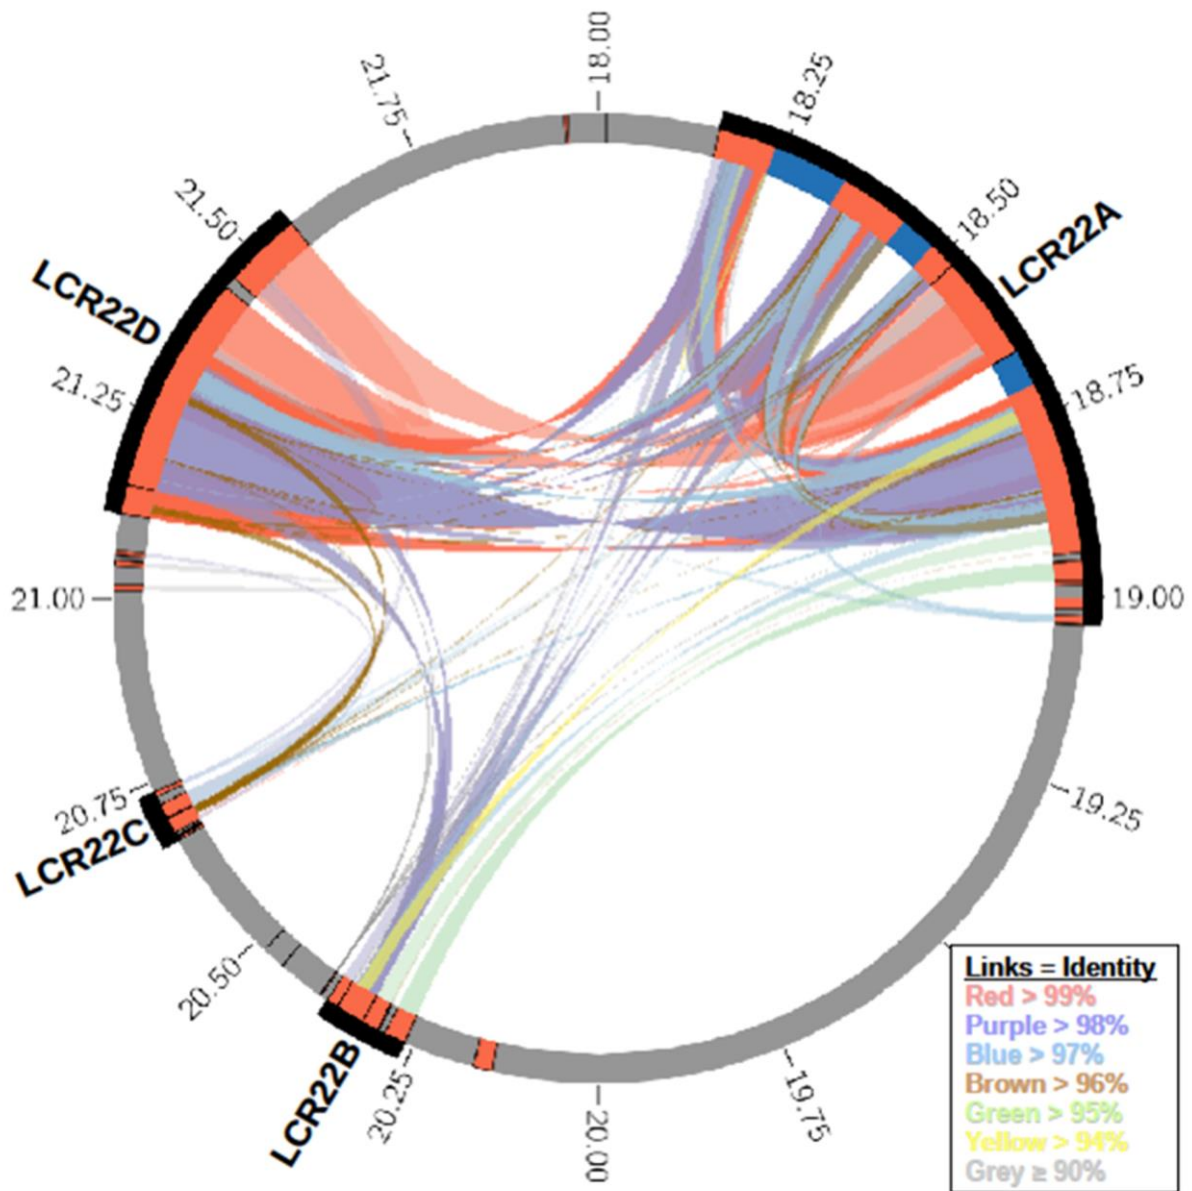

**Figure S1**

Paralogous relations among the four LCRs of chromosome 22q11.2. Numbers indicate hg38 chromosome 22 coordinates in Mb. Black bars on the outer circle delineate conventional coordinates of LCR22A, LCR22B, LCR22C, and LCR22D. Blue rectangles in LCR22A depict gaps in the reference sequence. Segmental duplicated sequences are shown in orange and the unique sequences in grey. Connecting lines, color-coded by percent identity, show paralogous relations between subunits within and between LCR22s. The plot was generated with Circos v0.64<sup>1</sup> using segmental duplication definitions<sup>2,3</sup> as downloaded from the UCSC genome browser<sup>4</sup>.

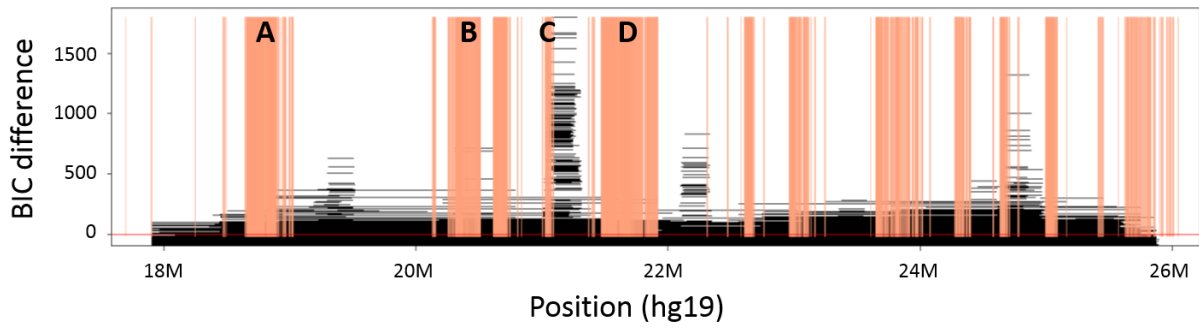

**Figure S2**

Detailed InveRision<sup>5</sup> plot of chromosome 22q11 using single nucleotide variation data from the European samples of the 1000G project<sup>6</sup>. Segment sizes ranged from 0.2 to 3 Mb. Orange boxes highlight the location of the LCR blocks. Several putative inversions were found in the region with the strongest signal located between LCR22C and LCR22D

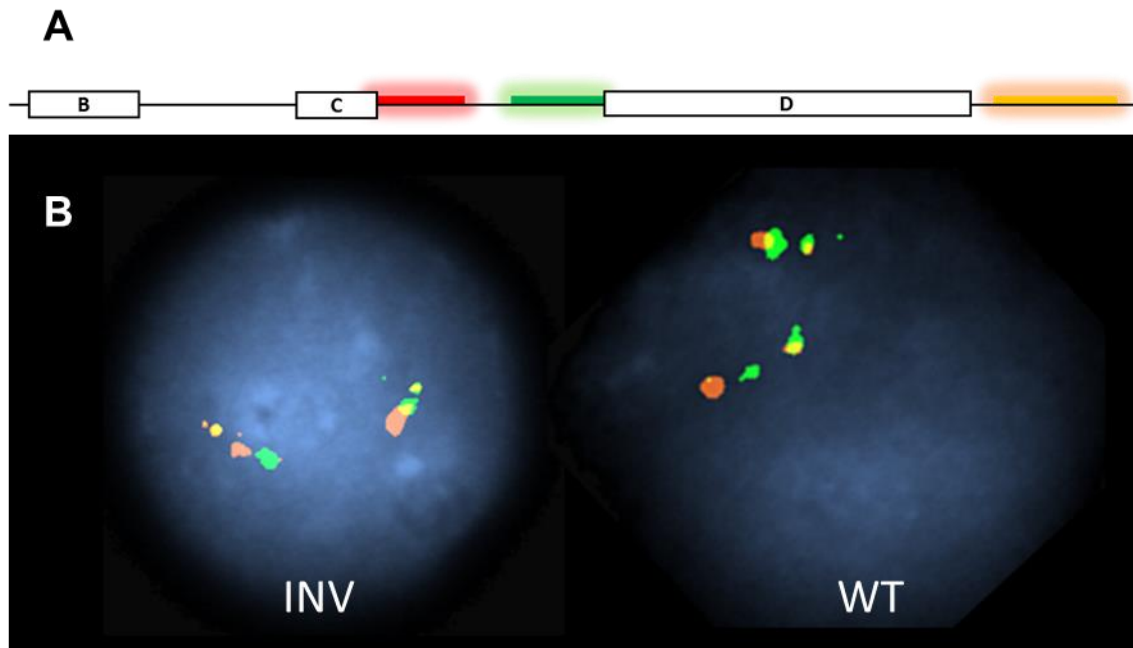

**Figure S3**

Interphase FISH. **(A)** probe design aligned with schematic representation of the LCR22B-D region. Red (SpectrumOrange labelled) and green (SpectrumGreen labelled) and yellow (a mix of SpectrumOrange and SpectrumGreen) BACs (hg38, RP11-590C5, chr22:20,7260,03-20,906,345, RP11-165F18, chr22:20,934,046-21,099,834 and RP11-354K13, chr22:21,588,266-21,764,059) respectively proximal and distal from LCR22D. Nick Translation (Abbott Molecular, Abbott Park, Illinois, U.S.A.) was used for labelling **(B)**. Overlay of three channel recording (DAPI, SpectrumGreen, SpectrumOrange) showcasing an interphase cell heterozygous for an inversion in the LCR22B-C-D region. Detailed image of the signals show probe orders red-green-yellow (WT) and green-red-yellow (INV).

**Table S1**

Fiber-FISH and parent-of-origin data of 17 families. For individuals screened with the secondary probe set, detected inversion type is indicated. Results of interphase FISH validations are shown in the right column for 12 individuals (marked with \*).

| family             | Sample origin                  | fiber pattern<br>INVERTED | fiber pattern<br>REFERENCE | % fiber signals<br>INVERTED | Call    | Inversion type<br>determined by<br>pattern 2 | % interphase<br>signals<br>INVERTED |
|--------------------|--------------------------------|---------------------------|----------------------------|-----------------------------|---------|----------------------------------------------|-------------------------------------|
| 1                  | non-transmitting parent        | 1                         | 11                         | 8,33%                       | hom REF |                                              |                                     |
|                    | parent-of-origin               | 8                         | 7                          | 53,33%                      | het INV |                                              |                                     |
| 2                  | non-transmitting parent        | 0                         | 10                         | 0,00%                       | hom REF |                                              |                                     |
|                    | parent-of-origin               | 4                         | 16                         | 20,00%                      | het INV | Type B-D                                     |                                     |
| 3                  | non-transmitting parent        | 0                         | 11                         | 0,00%                       | hom REF |                                              |                                     |
|                    | parent-of-origin               | 0                         | 12                         | 0,00%                       | hom REF |                                              |                                     |
| 4                  | non-transmitting parent        | 4                         | 6                          | 40,00%                      | het INV |                                              |                                     |
|                    | parent-of-origin               | 14                        | 15                         | 48,28%                      | het INV |                                              |                                     |
|                    | patient                        | 0                         | 8                          | 0,00%                       | REF     |                                              |                                     |
| 5                  | non-transmitting parent        | 4                         | 19                         | 17,39%                      | hom REF |                                              |                                     |
|                    | parent-of-origin               | 9                         | 8                          | 52,94%                      | het INV |                                              |                                     |
| 6                  | non-transmitting parent        | 1                         | 13                         | 7,14%                       | hom REF |                                              |                                     |
|                    | parent-of-origin               | 4                         | 8                          | 33,33%                      | het INV |                                              |                                     |
| 7                  | non-transmitting parent        | 1                         | 10                         | 9,09%                       | hom REF |                                              |                                     |
|                    | parent-of-origin               | 3                         | 10                         | 23,08%                      | het INV |                                              |                                     |
| 8                  | non-transmitting parent        | 5                         | 15                         | 25,00%                      | het INV | Type B-D                                     |                                     |
|                    | parent-of-origin               | 3                         | 7                          | 30,00%                      | het INV | Type B-D                                     |                                     |
|                    | patient                        | 0                         | 8                          | 0,00%                       | REF     |                                              |                                     |
| 9                  | non-transmitting parent        | 7                         | 6                          | 53,85%                      | het INV |                                              |                                     |
|                    | parent-of-origin               | 4                         | 10                         | 28,57%                      | het INV |                                              |                                     |
|                    | patient                        | 0                         | 9                          | 0,00%                       | REF     |                                              |                                     |
| 10                 | non-transmitting parent        | 4                         | 8                          | 33,33%                      | het INV |                                              |                                     |
|                    | parent-of-origin               | 6                         | 15                         | 28,57%                      | het INV | Type B-D                                     |                                     |
|                    | patient                        | 0                         | 8                          | 0,00%                       | REF     |                                              |                                     |
| 11                 | non-transmitting parent *      | 6                         | 32                         | 15,79%                      | hom REF |                                              | 14,29%                              |
|                    | parent-of-origin *             | 2                         | 8                          | 20,00%                      | het INV |                                              | 44,12%                              |
|                    | patient *                      | 0                         | 9                          | 0,00%                       | REF     |                                              | 13,73%                              |
| 12                 | non-transmitting parent *      | 6                         | 9                          | 40,00%                      | het INV |                                              | 43,24%                              |
|                    | parent-of-origin               | 2                         | 8                          | 20,00%                      | het INV | Type B-D                                     |                                     |
|                    | patient *                      | 1                         | 11                         | 8,33%                       | REF     |                                              | 11,11%                              |
| 13                 | non-transmitting parent        | 3                         | 9                          | 25,00%                      | het INV | Type B-D                                     |                                     |
|                    | parent-of-origin               | 5                         | 5                          | 50,00%                      | het INV | Type C-D                                     |                                     |
|                    | patient                        | 0                         | 13                         | 0,00%                       | REF     |                                              |                                     |
| 14                 | non-transmitting parent        | 4                         | 6                          | 40,00%                      | het INV | Type C-D                                     |                                     |
|                    | parent-of-origin               | 5                         | 8                          | 38,46%                      | het INV | Type B-D                                     |                                     |
|                    | patient                        | 0                         | 10                         | 0,00%                       | REF     |                                              |                                     |
| 15                 | non-transmitting parent *      | 11                        | 23                         | 32,35%                      | het INV |                                              | 40,28%                              |
|                    | parent-of-origin               | 4                         | 4                          | 50,00%                      | het INV |                                              |                                     |
| 16                 | non-transmitting parent *      | 0                         | 13                         | 0,00%                       | hom REF |                                              | 10,20%                              |
|                    | parent-of-origin *             | 12                        | 18                         | 40,00%                      | het INV |                                              | 46,30%                              |
|                    | patient (deletion LCR22A-B) *  | 9                         | 10                         | 47,37%                      | het INV |                                              | 36,11%                              |
| 17                 | non-transmitting parent *      | 0                         | 9                          | 0,00%                       | hom REF |                                              | 14,29%                              |
|                    | parent-of-origin *             | 4                         | 6                          | 40,00%                      | het INV |                                              | 42,86%                              |
|                    | patient (duplication LCR22A-D) | 7                         | 4                          | 63,64%                      | het INV |                                              |                                     |
| Population samples | RANDOM 1                       | 3                         | 7                          | 30,00%                      | het INV | Type B-D                                     |                                     |
|                    | RANDOM 2                       | 3                         | 6                          | 33,33%                      | het INV | Type B-D                                     |                                     |
|                    | RANDOM 3                       | 2                         | 7                          | 22,22%                      | het INV |                                              |                                     |
|                    | RANDOM 4                       | 1                         | 9                          | 10,00%                      | hom REF |                                              |                                     |
|                    | RANDOM 5                       | 1                         | 9                          | 10,00%                      | hom REF |                                              |                                     |
|                    | RANDOM 6                       | 1                         | 10                         | 9,09%                       | hom REF |                                              |                                     |
|                    | RANDOM 7                       | 2                         | 8                          | 20,00%                      | het INV |                                              |                                     |
|                    | HAPMAP - GM19238               | 1                         | 10                         | 9,09%                       | hom REF |                                              |                                     |
|                    | HAPMAP - GM19239               | 1                         | 9                          | 10,00%                      | hom REF |                                              |                                     |
|                    | HAPMAP - GM19240 *             | 11                        | 20                         | 35,48%                      | het INV | Type C-D                                     | 40,91%                              |
|                    | HAPMAP - GM12878               | 7                         | 8                          | 46,67%                      | het INV |                                              |                                     |
|                    | Hydatiform mole - CHM1         | 0                         | 8                          | 0,00%                       | REF     |                                              |                                     |
|                    | Hydatiform mole - CHM13        | 0                         | 10                         | 0,00%                       | REF     |                                              |                                     |

## Supplementary references

1. Krzywinski, M., Schein, J., Birol, I., Connors, J., Gascoyne, R., Horsman, D., Jones, S.J., and Marra, M.A. (2009). Circo: An information aesthetic for comparative genomics. *Genome Res.* *19*, 1639–1645.
2. Bailey, J.A., Yavor, A.M., Massa, H.F., Trask, B.J., and Eichler, E.E. (2001). Segmental duplications: Organization and impact within the current human genome project assembly. *Genome Res.* *11*, 1005–1017.
3. Bailey, J.A., Gu, Z., Clark, R.A., Reinert, K., Samonte, R. V, Schwartz, S., Adams, M.D., Myers, E.W., Li, P.W., and Eichler, E.E. (2002). Recent segmental duplications in the human genome. *Science* (80-). *297*, 1003–1007.
4. Kent, W.J., Sugnet, C.W., Furey, T.S., Roskin, K.M., Pringle, T.H., Zahler, A.M., and Haussler, a. D. (2002). The Human Genome Browser at UCSC. *Genome Res.* *12*, 996–1006.
5. Cáceres, A., Sindi, S.S., Raphael, B.J., Cáceres, M., and González, J.R. (2012). Identification of polymorphic inversions from genotypes. *BMC Bioinformatics* *13*, 28.
6. Auton, A., Abecasis, G.R., Altshuler, D.M., Durbin, R.M., Abecasis, G.R., Bentley, D.R., Chakravarti, A., Clark, A.G., Donnelly, P., Eichler, E.E., et al. (2015). A global reference for human genetic variation. *Nature* *526*, 68–74.
